# Supplementary material
Source: PubMed Central journal article supplement (PMC3591839)
Supplement: mmc1.pdf [file mmc1.pdf]

The American Journal of Human Genetics, Volume 92

**Supplemental Data**

**Mutations in *C12orf57* Cause a Syndromic Form  
of Colobomatous Microphthalmia**

Fatema Zahrani, Mohammed A. Aldahmesh, Muneera J. Alshammari, Selwa Al-Hazzaa, and Fowzan S. Alkuraya

Figure S1

Family 1

3 affected individuals

Parents

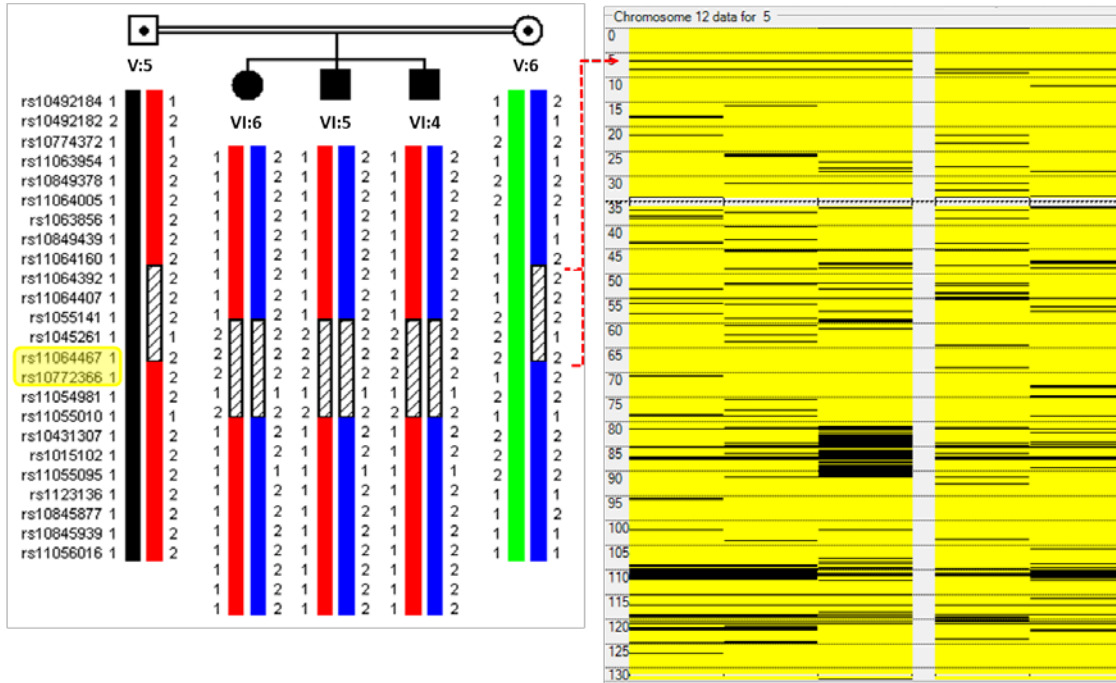

Figure S1. Autozygosity analysis of a family with a syndromic form of colobomatous microphthalmia. Right: Homozygosity scan in Family 1 shows no apparent ROH at the *C12orf57* locus. Please note that each column represents one family member and each row represents a SNP on chromosome 12. Homozygous SNPs are shown in black and heterozygous in yellow. Left: Haplotype analysis revealed a very small ROH delimited by rs11064160 and rs10772366. *C12orf37* is flanked by rs11064467 and rs10772366 (highlighted in yellow).

Figure S2

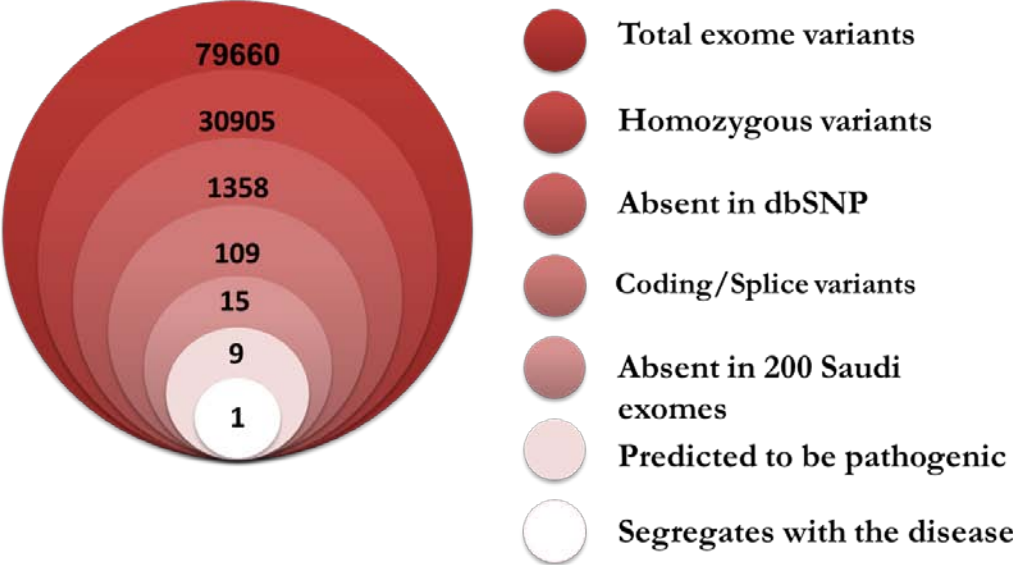

Figure S2. Filtration strategy used in analyzing exome data in Family 1.

Figure S3

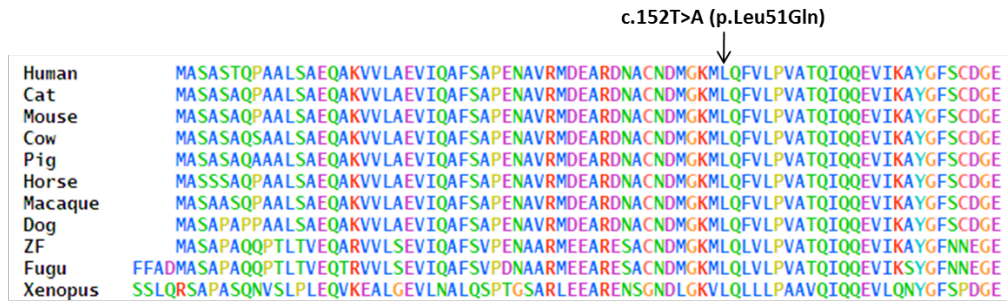

Figure S3. High level of conservation across species is shown for the Leu51 residue
